# Supplementary material for: The Art and Science of Selecting a CD123-Specific Chimeric Antigen Receptor for Clinical Testing
Source: PubMed Central journal article supplement — Mol Ther Methods Clin Dev. 2020 Jun 30;18:571–81. doi: 10.1016/j.omtm.2020.06.024 (PMC7393323; doi:10.1016/j.omtm.2020.06.024), 2020-06-30
Supplement: mmc1.pdf [file mmc1.pdf]

**OMTM, Volume 18**

**Supplemental Information**

**The Art and Science of Selecting**

**a CD123-Specific Chimeric**

**Antigen Receptor for Clinical Testing**

**Janice M. Riberdy, Sheng Zhou, Fei Zheng, Young-In Kim, Jennifer Moore, Abishek Vaidya, Robert E. Throm, April Sykes, Natasha Sahr, Challice L. Bonifant, Byoung Ryu, Stephen Gottschalk, and Mireya Paulina Velasquez**

### 8.41BBz

MTTPRNSVNGTFPAEPMKGP IAMQSGPKPLFRRMSSLVGPTQSFFMRESKTLGAVQIMNGLFHIALGGLLMI PAGIYAPICVTVVYPLWGG  
IMYIISGSLLAATEKNSRKCLVKGMIMNSLSLFAAISGMILSMDILNIKISHFLKMESLNFIRAHTPYINIYNCEPANPSEKNSPSTQY  
CYSIQSLFLGILSVMLIFAFFQELVIAGIVENEWKRTC SRPKSNIVLLSAEEKKEQTIEIKEEVVGLTETSSQPKNEEDIEIPIQEEEE  
ETETNFPEPPQDQESSPIENDSSPASRAEGRGSLTTCGDVEENPGPMALPVTALLPLALLLHAARPQVQLQPPGAELVRPGASVKLSCKA  
SGYTFTSYWMNWVKQRPDQGLEWIGRIDPYDSETHYNQKFKDKAILTVDKSSSTAYMQLSSLTSEDSAVYYCARGNWDDYWGQGTTLTVSS  
GGGGSGGGSGGGGSDVQITQSPSYLAASPGETITINCRASKSISKDLAWYQEKPGKTNKLLIYSGSTLQSGIPSRFSGSGSGTDFTLTIS  
SLEPEDFAMYQCQHKNKYPTFFGGGKLEIKSTTTTAPRPPTPAPT IASQPLSLRPEACRPAAGGAVHTRGLDFACDIYIWAPLAGTCGV  
LLSLVITLYCKRGRKLLYIFKQPFMRPVQTTQEEDGCSCRFPEEEEGGCELVRKFSRSADAPAYQQGQNQLYNELNLGRREYDVLDKRR  
GRDPEMGGKPRRKNPQEGLYNELQKDKMAEAYSEIGMKGERRRGKGDGLYQGLSTATKDTYDALHMQUALPPR

### 8.28z

MTTPRNSVNGTFPAEPMKGP IAMQSGPKPLFRRMSSLVGPTQSFFMRESKTLGAVQIMNGLFHIALGGLLMI PAGIYAPICVTVVYPLWGG  
IMYIISGSLLAATEKNSRKCLVKGMIMNSLSLFAAISGMILSMDILNIKISHFLKMESLNFIRAHTPYINIYNCEPANPSEKNSPSTQY  
CYSIQSLFLGILSVMLIFAFFQELV\ IAGIVENEWKRTC SRPKSNIVLLSAEEKKEQTIEIKEEVVGLTETSSQPKNEEDIEIPIQEEEE  
EETETNFPEPPQDQESSPIENDSSPASRAEGRGSLTTCGDVEENPGPMALPVTALLPLALLLHAARPQVQLQPPGAELVRPGASVKLSCKA  
ASGYTFTSYWMNWVKQRPDQGLEWIGRIDPYDSETHYNQKFKDKAILTVDKSSSTAYMQLSSLTSEDSAVYYCARGNWDDYWGQGTTLTVS  
SGGGSGGGSGGGGSDVQITQSPSYLAASPGETITINCRASKSISKDLAWYQEKPGKTNKLLIYSGSTLQSGIPSRFSGSGSGTDFTLTIS  
SSLEPEDFAMYQCQHKNKYPTFFGGGKLEIKSTTTTAPRPPTPAPT IASQPLSLRPEACRPAAGGAVHTRGLDFACDIYIWAPLAGTCGV  
LLSLVITLYCRSKRSRLLHSDYMNMTPRRPGPTRKHYPYAPPRDFAAYRSRVKFSRSADAPAYQQGQNQLYNELNLGRREYDVLDKRR  
GRDPEMGGKPRRKNPQEGLYNELQKDKMAEAYSEIGMKGERRRGKGDGLYQGLSTATKDTYDALHMQUALPPR

### 716.8.28z

MTTPRNSVNGTFPAEPMKGP IAMQSGPKPLFRRMSSLVGPTQSFFMRESKTLGAVQIMNGLFHIALGGLLMI PAGIYAPICVTVVYPLWGG  
IMYIISGSLLAATEKNSRKCLVKGMIMNSLSLFAAISGMILSMDILNIKISHFLKMESLNFIRAHTPYINIYNCEPANPSEKNSPSTQY  
CYSIQSLFLGILSVMLIFAFFQELVIAGIVENEWKRTC SRPKSNIVLLSAEEKKEQTIEIKEEVVGLTETSSQPKNEEDIEIPIQEEEE  
ETETNFPEPPQDQESSPIENDSSPASRAEGRGSLTTCGDVEENPGPMALPVTALLPLALLLHAARPQVQLQPPGAELVRPGASVKLSCKA  
SGYIFTNYGMNWVKQAPGKSKFWMGWINTYTGESTYSADFKGRFAFSLETSASTAYLHINDLKNETATYFCARSGGYDPMDYWGQGTSVT  
VSSGGGGSGGGGSDIVLTQSPASLAVSLGQRATISCRASESVDNYGNTFMHWYQKPGQP KLLIYRASNLSEGI PARFSGSGSRT  
DFTLTINPVEADDVATYYCQSNEDPPTFGAGTKLELKTTPAPRPPTPAPT IASQPLSLRPEACRPAAGGAVHTRGLDFACDIYIWAPLA  
GTCGVLLSLVITLYCRSKRSRLLHSDYMNMTPRRPGPTRKHYPYAPPRDFAAYRSRVKFSRSADAPAYQQGQNQLYNELNLGRREYDVL  
LDKRRGRDPEMGGKPRRKNPQEGLYNELQKDKMAEAYSEIGMKGERRRGKGDGLYQGLSTATKDTYDALHMQUALPPR

### 28.28z

MTTPRNSVNGTFPAEPMKGP IAMQSGPKPLFRRMSSLVGPTQSFFMRESKTLGAVQIMNGLFHIALGGLLMI PAGIYAPICVTVVYPLWGG  
IMYIISGSLLAATEKNSRKCLVKGMIMNSLSLFAAISGMILSMDILNIKISHFLKMESLNFIRAHTPYINIYNCEPANPSEKNSPSTQY  
CYSIQSLFLGILSVMLIFAFFQELVIAGIVENEWKRTC SRPKSNIVLLSAEEKKEQTIEIKEEVVGLTETSSQPKNEEDIEIPIQEEEE  
ETETNFPEPPQDQESSPIENDSSPASRAEGRGSLTTCGDVEENPGPMALPVTALLPLALLLHAARPQVQLQPPGAELVRPGASVKLSCKA  
SGYTFTSYWMNWVKQRPDQGLEWIGRIDPYDSETHYNQKFKDKAILTVDKSSSTAYMQLSSLTSEDSAVYYCARGNWDDYWGQGTTLTVSS  
GGGGSGGGSGGGGSDVQITQSPSYLAASPGETITINCRASKSISKDLAWYQEKPGKTNKLLIYSGSTLQSGIPSRFSGSGSGTDFTLTIS  
SLEPEDFAMYQCQHKNKYPTFFGGGKLEIKSIEVMYPPPYLDNEKSNGTI IHVKGKHLCPSPFLPGPSKPFWWLVVVGGVLACYSLLV  
VAFIIFWVRSKRSRLLHSDYMNMTPRRPGPTRKHYPYAPPRDFAAYRSRVKFSRSADAPAYQQGQNQLYNELNLGRREYDVLDKRRGRD  
PEMGGKPRRKNPQEGLYNELQKDKMAEAYSEIGMKGERRRGKGDGLYQGLSTATKDTYDALHMQUALPPR

### 28.28.41BBz

MTTPRNSVNGTFPAEPMKGP IAMQSGPKPLFRRMSSLVGPTQSFFMRESKTLGAVQIMNGLFHIALGGLLMI PAGIYAPICVTVVYPLWGG  
IMYIISGSLLAATEKNSRKCLVKGMIMNSLSLFAAISGMILSMDILNIKISHFLKMESLNFIRAHTPYINIYNCEPANPSEKNSPSTQY  
CYSIQSLFLGILSVMLIFAFFQELVIAGIVENEWKRTC SRPKSNIVLLSAEEKKEQTIEIKEEVVGLTETSSQPKNEEDIEIPIQEEEE  
ETETNFPEPPQDQESSPIENDSSPASRAEGRGSLTTCGDVEENPGPMALPVTALLPLALLLHAARPQVQLQPPGAELVRPGASVKLSCKA  
SGYTFTSYWMNWVKQRPDQGLEWIGRIDPYDSETHYNQKFKDKAILTVDKSSSTAYMQLSSLTSEDSAVYYCARGNWDDYWGQGTTLTVSS  
GGGGSGGGSGGGGSDVQITQSPSYLAASPGETITINCRASKSISKDLAWYQEKPGKTNKLLIYSGSTLQSGIPSRFSGSGSGTDFTLTIS  
SLEPEDFAMYQCQHKNKYPTFFGGGKLEIKSIEVMYPPPYLDNEKSNGTI IHVKGKHLCPSPFLPGPSKPFWWLVVVGGVLACYSLLV  
AFIIFWVRSKRSRLLHSDYMNMTPRRPGPTRKHYPYAPPRDFAAYRSRVKFSRSADAPAYQQGQNQLYNELNLGRREYDVLDKRRGRD  
PEMGGKPRRKNPQEGLYNELQKDKMAEAYSEIGMKGERRRGKGDGLYQGLSTATKDTYDALHMQUALPPR

**Supplemental Figure 1: Amino acid sequence of genes encoding CD20, 2A, and individual CD123-CARs. One letter code amino acid sequence of used constructs.**

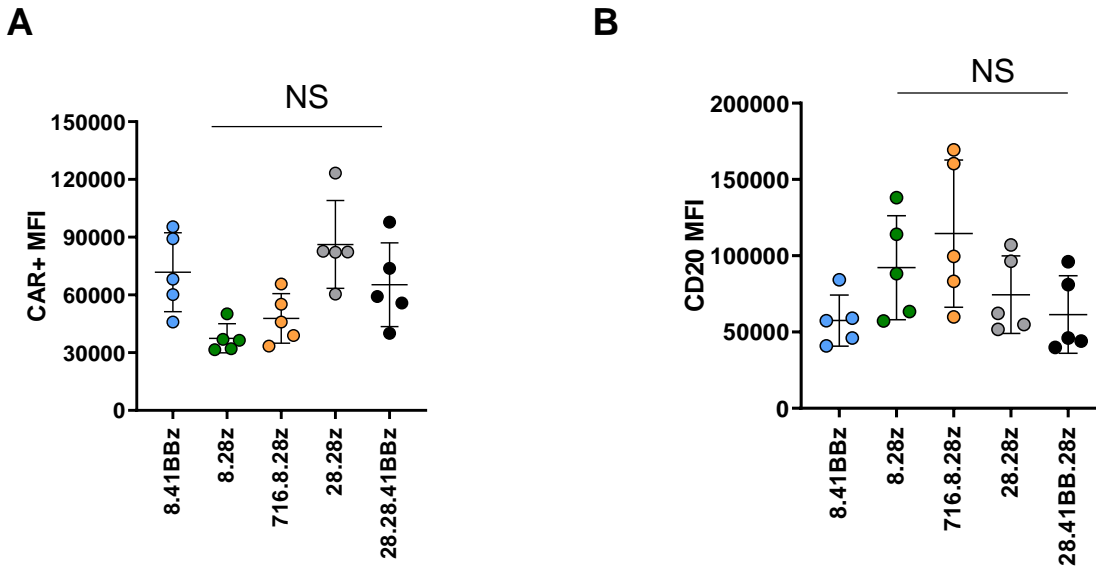

**Supplemental Figure 2: CD123-CAR<sup>CD20</sup> T-cells have similar transduction efficiencies. (A,B)** CD123-CAR<sup>CD20</sup> T-cells were stained and analyzed by flow cytometry for % CAR and CD20 expression and mean fluorescence intensity (MFI). **(A)** CAR MFI (N=5, p=NS). **(B)** CD20 MFI (N=5, p=NS).

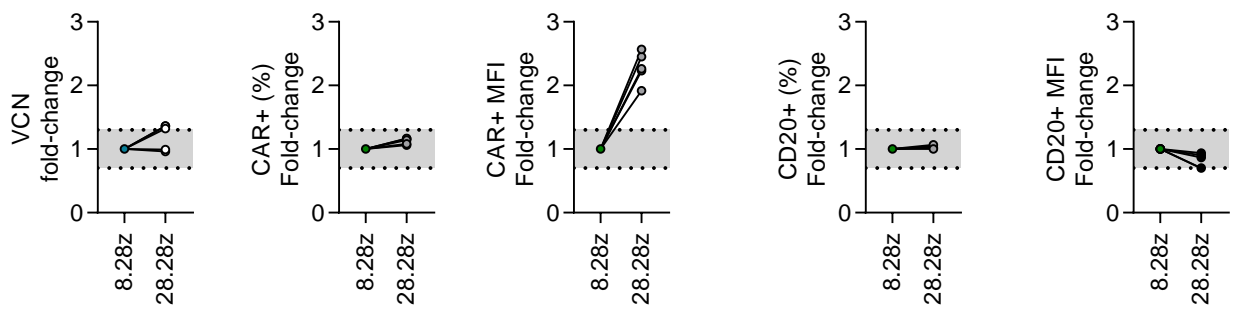

**Supplemental Figure 3: T cells transduced with 28.28z-CARs express higher MFI levels of CARs than T cells transduced with 8.28z-CARs.** Fold-change of 28.28z- and 8.28z-CAR T cells using the data presented in Figure 1 and Supplemental Figure 2 (n=5; shaded area: 0.7- to 1.3-fold change).

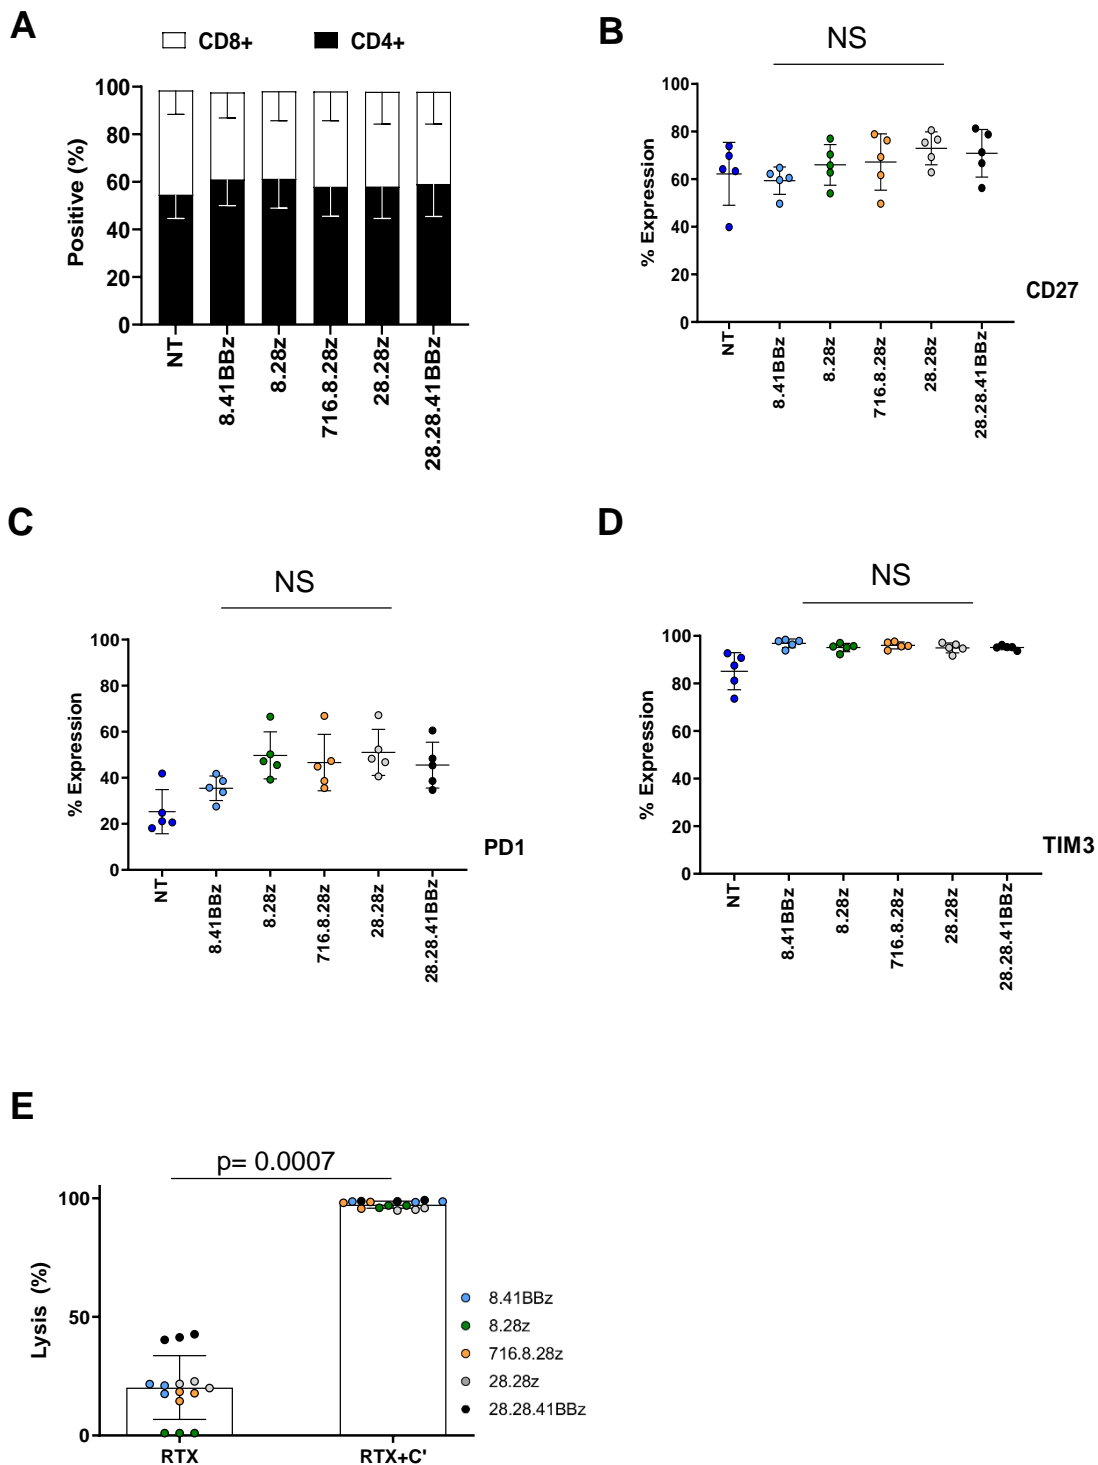

**Supplemental Figure 4: CD123-CAR<sup>CD20</sup> T-cells have similar CD4:CD8 ratios, expression of CD27, PD1 and TIM3 and are effectively eliminated by rituximab in vitro. (A)** CD4:CD8 ratio distribution as assessed by flow cytometry. **(B-D)** Evaluation of CD27, PD1 and TIM3 expression using flow cytometry assay. **(E)** T-cells treated with rituximab (RTX) alone or rituximab plus baby rabbit complement (RTX+C') were analyzed by flow cytometry to determine the percent of CD20+ cells lysed (N=15).

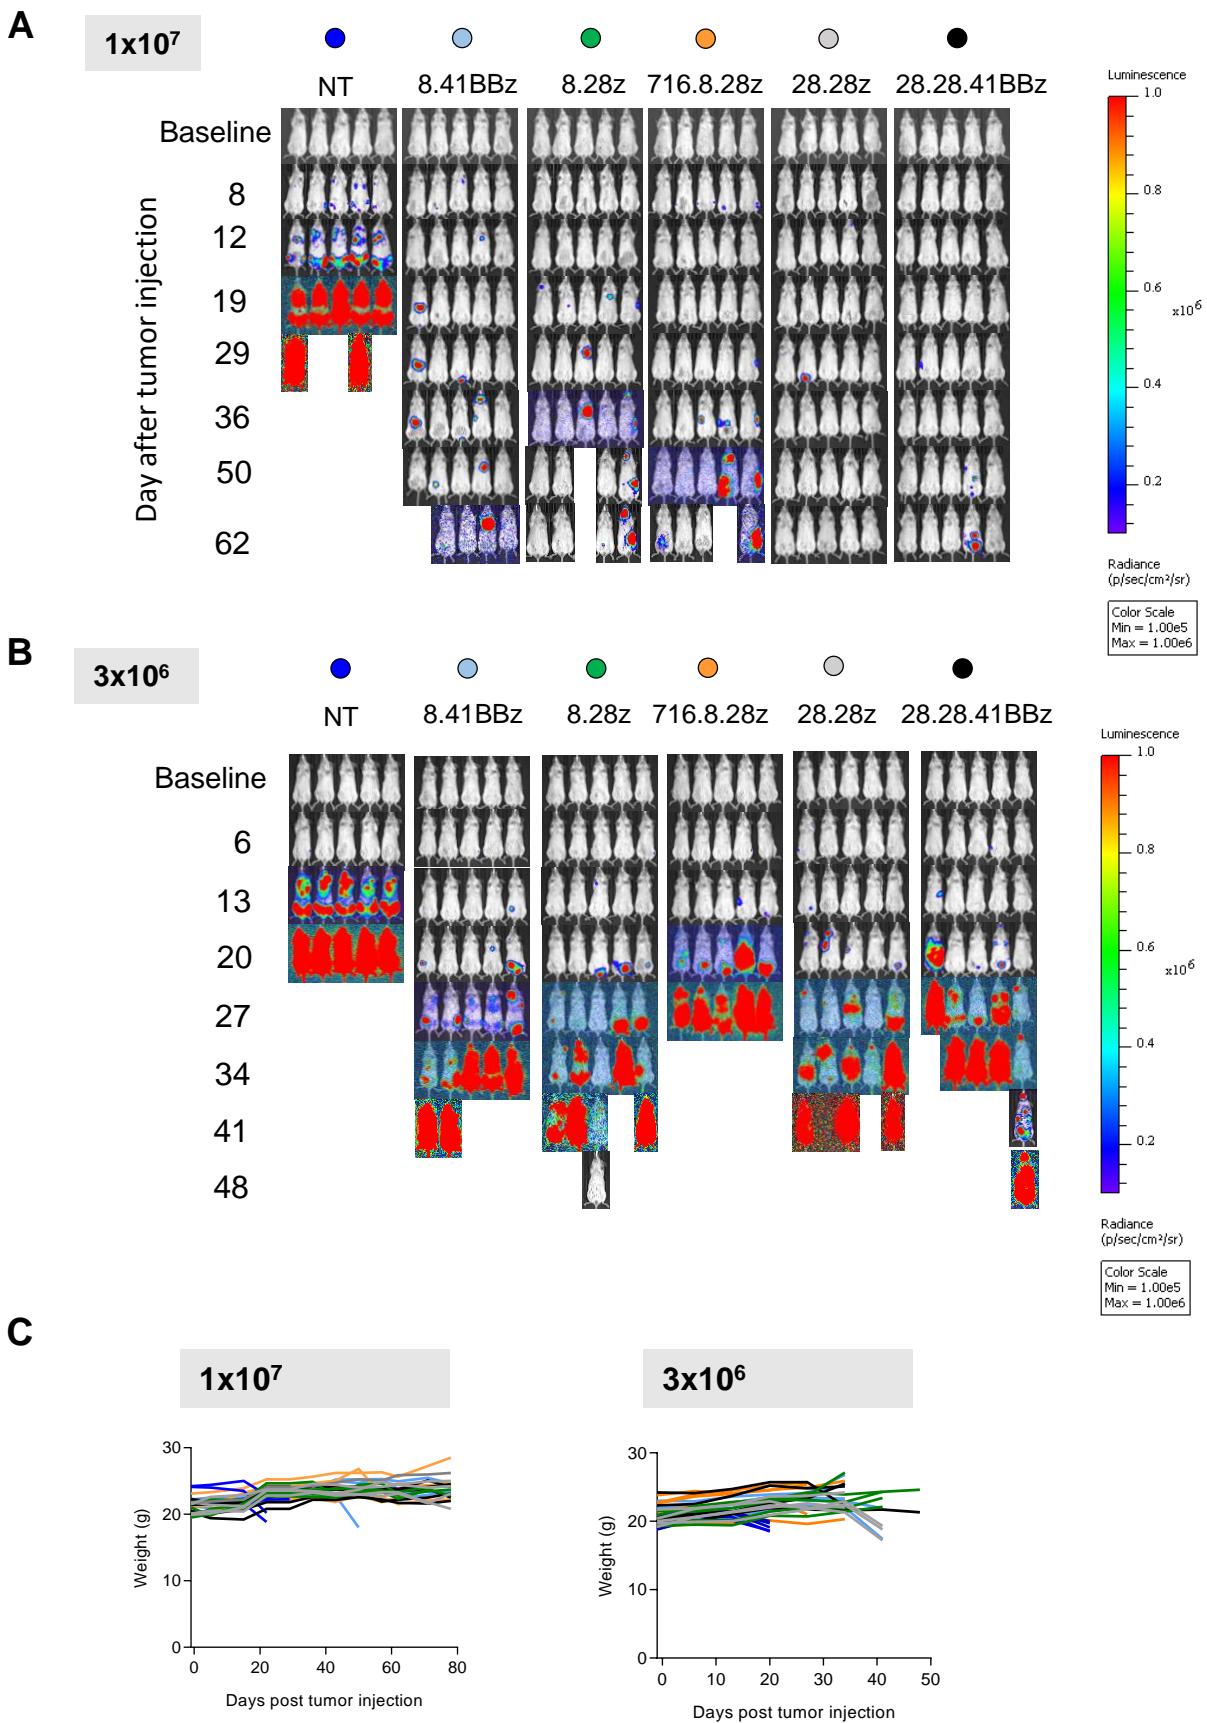

**Supplemental Figure 5: CD123-CAR<sup>CD20</sup> T-cells have antitumor activity *in vivo* without any weight changes.** This is supplemental data for the animal experiment shown in Figure 5. **(A, B)** Representative images of animal experiments using  $1 \times 10^7$  and  $3 \times 10^6$  T-cells as treatment (scale:  $1 \times 10^5$ - $1 \times 10^6$ ). **(C)** Weights of animals.

**A**

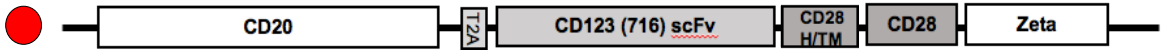

**B**

**716.28.28z**

MTTPRNSVNGTFPAEPMKGP IAMQSGPKPLFRMSSLVGP TQSFFMRESKTLGAVQIMNGLFHIALGGLLMIPAGIYAPICVTVVWYPLWGG  
IMYIISGSLLAATEKNSRKCLVKGKMIMNSLSLFAAISGMILSIMDILNIKISHFLKMESLNFIRAHTPYINIYNCEPANPSEKNPSTQY  
CYSIQSLFLGILSVMLIFAFFQELVIAGIVENEWKRTCSRPKSNIVLLSAEEKKEQTIEIKEEVVGLTETSSQPKNEEDIEIPIQEEEE  
ETETNFPPEPPDQESSPIENDSSPASRAEGRGSLTCGDVEENPGPMALPVTALLLPLALLLHAARPQIQLVQSGPELKKPGETVKISCKA  
SGYIFTNYGMNWVKQAPGKSFKMMGWINTYTGESTYSADFGRFAFSLETSASTAYLHINDLKNEDTATYFCARSGGYDPMDYWGQTSVT  
VSSGGGSGGGGSGGGSDIVLTQSPASLAVSLGQRATISCRASESVDNYGNTFMHWYQQKPGQPPKLLIYRASNLESGIPARFSGSGSRT  
DFTLTINPVEADDVATYYCQQSNEDPPTFGAGTKLELKEIVMYPPPYLDNEKSNGTI IHVKGKHLCPSPFPKPKPFVVLVVVGGVLACY  
SLLVTVAFIIFWVRSKRSRLHSDYMNMTPRRPGPTRKHYQPYAPPRDFAAYRSRVKFSRSADAPAYQQGNQLYNELNLGRREEYDVLDK  
RRGRDPEMGGKPRRKNPQEGLYNELQKDKMAEAYSEIGMKGERRRGKGDGLYQGLSTATKDTYDALHMQUALPPR

**Supplemental Figure 6: Scheme and sequence of 716.28.28z CAR. (A) Scheme, (B) amino acid sequence.**

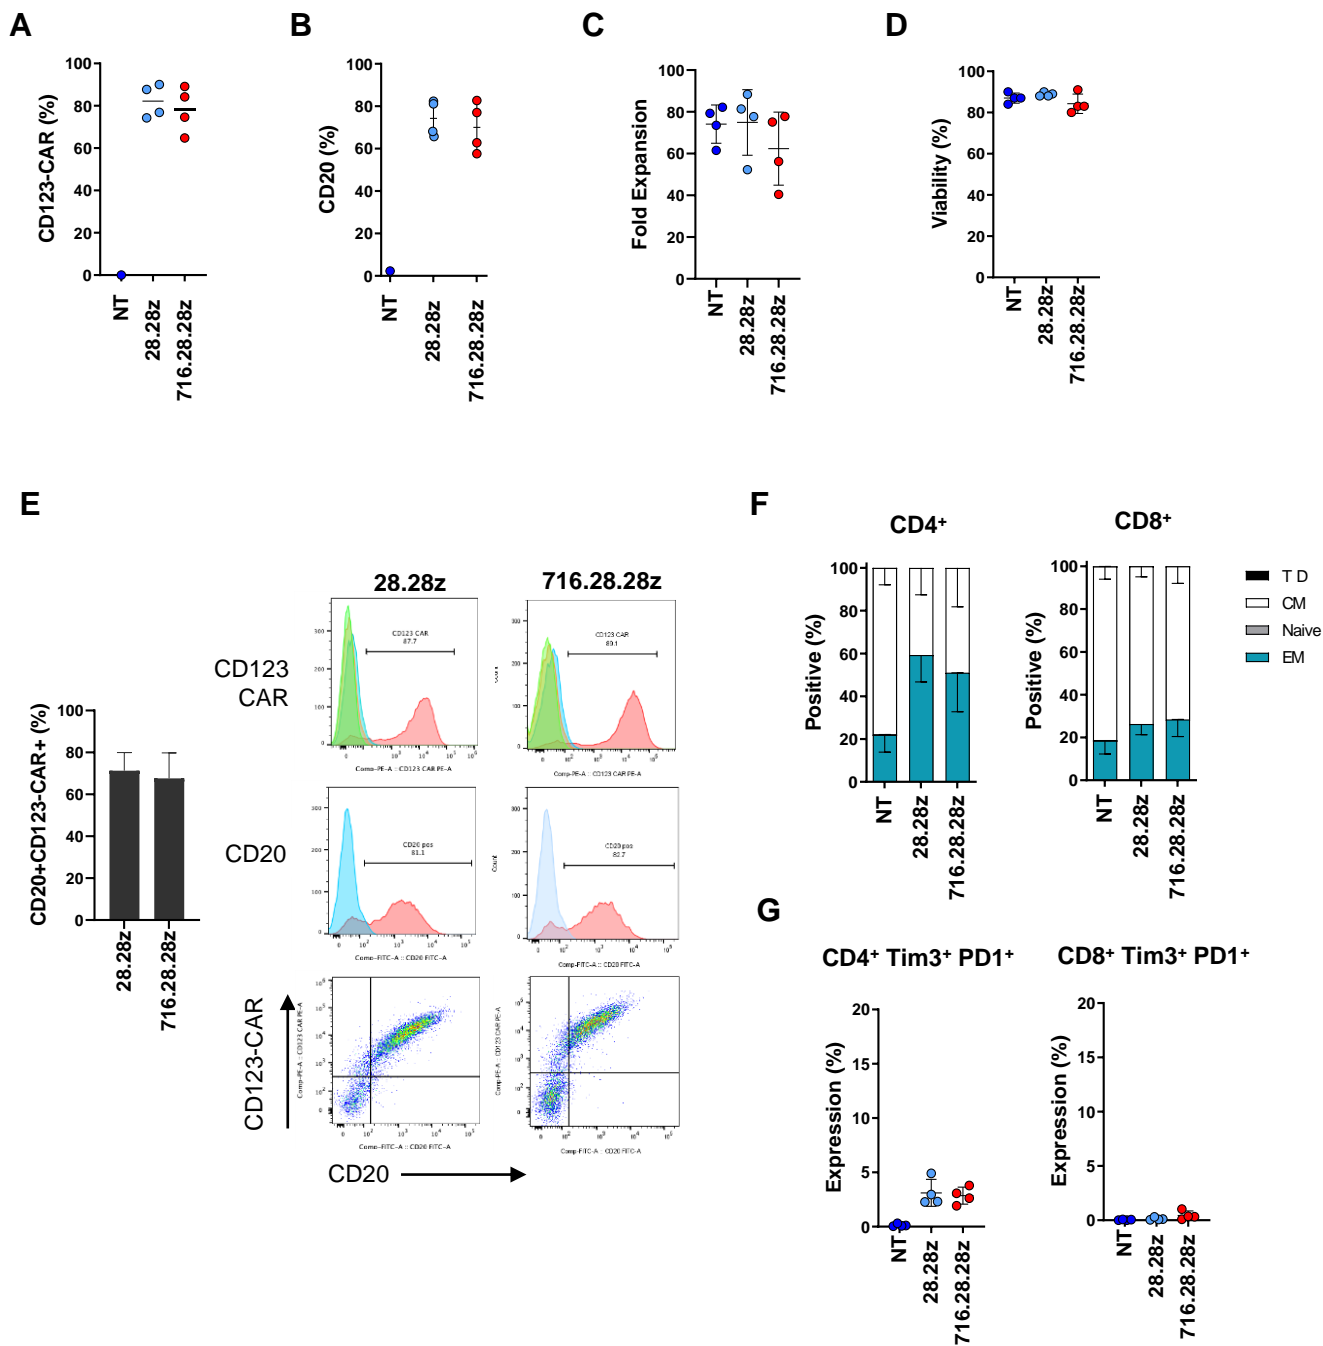

**Supplemental Figure 7: Comparison of CD28z based CD123-CAR<sup>CD20</sup> T-cells.** CD123-CAR<sup>CD20</sup> T-cells were generated by transduction with lentiviral vectors encoding 292 scFV-based (CD28.CD28z) or 716 scFV-based (716.CD28.CD28z) CARs and CD20. **(A)** CAR expression, **(B)** CD20 expression, **(C)** Fold expansion, **(D)** viability, **(E)** Percentage of double transduced T cells, **(F)** CD4:CD8 ratio, **(G)** Tim3/PD1 expression (n=4; no significance difference between CD28.CD28z vs 292.CD28.z for all analyzed parameters).



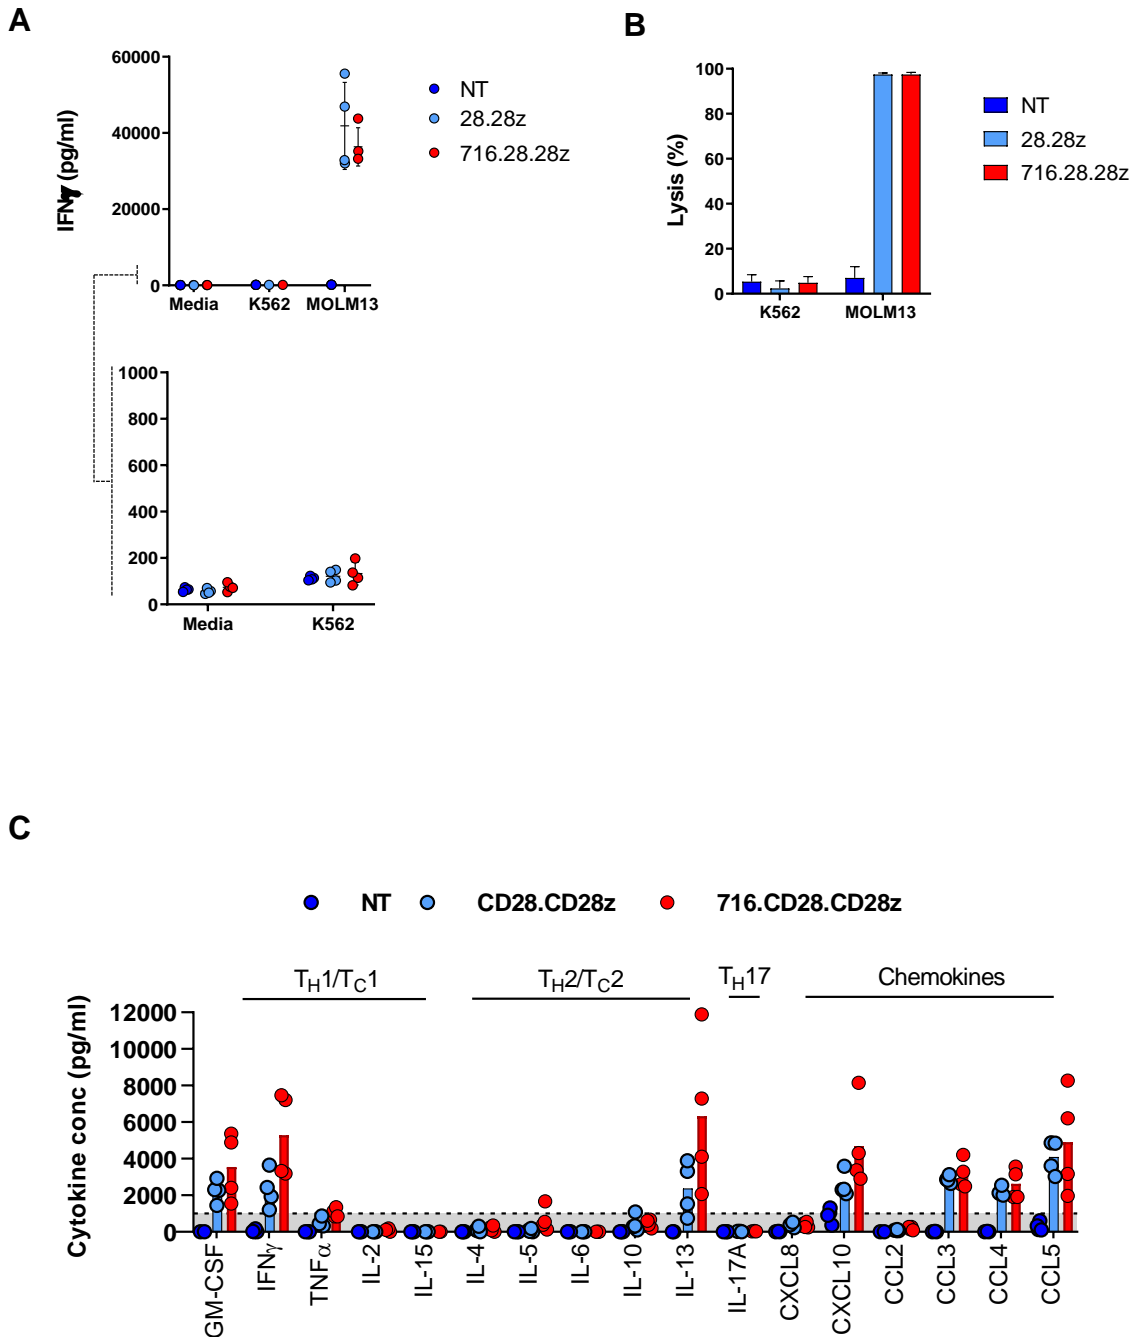

**Supplemental Figure 8: Comparison of CD28z based CD123-CAR<sup>CD20</sup> T-cells.** (A) Effector cells were grown in cocultures with media, K562 (CD123<sup>-</sup>), or Molm13 (CD123<sup>+</sup>) at an E:T ratio of 2:1 for 24 h. Supernatants were collected and evaluated for IFN- $\gamma$  content by ELISA (n = 4; p < 0.0001 for nontransduced [NT] vs both CD123-CAR<sup>CD20</sup> T-cell groups, and p > 0.05 for comparison 28.28z vs 716.28.28z). (B) Target cell populations were labeled with CFSE, incubated with effector T cells at the indicated ratios overnight and analyzed by flow cytometry by using absolute counting beads to determine cytotoxicity. n = 4; p > 0.05 for comparison on K562 targets and p < 0.0001 for CD123-CAR<sup>CD20</sup> T-cell groups as compared with NT on Molm13. (C) Effector cells were grown in cocultures with media, K562 (CD123<sup>-</sup>), or Molm13 (CD123<sup>+</sup>) at an E:T ratio of 2:1 for 24 h. Supernatants were collected and evaluated by Multiplex analysis. High level of cytokine production was defined as >1,000 pg/ml (indicated by dotted line).
